# Supplementary material for: A functionalization-free plasmonic hole-sphere nanogap SERS platform for reliable on-site analysis and oxide-state classification
Source: Royal Society of Chemistry journal article supplement (doi:10.1039/d5nr03414k), 2026-01-01
Supplement: d5nr03414k1.pdf [file d5nr03414k1.pdf]

## Supplementary Material

# Functionalization-free Plasmonic Hole-sphere Nanogap SERS Platform for Reliable On-site Analysis Oxide-state Classification

Minjun Kim<sup>a,1</sup>, Damun Heo<sup>b,1</sup>, Sung Yoon Cho<sup>c</sup>, Ye-Won Lee<sup>b</sup>, Sun-Hwa Gu<sup>b</sup>, Samir Adhikari<sup>d</sup>, Donghan Lee<sup>c,d</sup>,  
Seok Soon Jeong<sup>e</sup>, Hyuck Soo Kim<sup>e</sup>, Vasanthan Devaraj<sup>\*f</sup>, Thomas Zentgraf<sup>f</sup>, Min Yong Jeon<sup>\*a,c</sup>, Jongmin Lee<sup>\*b</sup>

<sup>a</sup> Institute of Quantum Systems, 99 Daehak-ro, Chungnam National University, Daejeon, 34134, Republic of Korea;

<sup>b</sup> School of Nano Convergence Technology & Nano Convergence Technology Center, Hallym University, Chuncheon 24252, Republic of Korea;

<sup>c</sup> Department of Physics, Chungnam National University, 99 Daehak-ro, Yuseong-gu, Daejeon, Korea 34134;

<sup>d</sup> Bright Quantum Inc., 99 Daehak-ro, Yuseong-gu, Daejeon, Korea 34134;

<sup>e</sup> Department of Biological Environment, Kangwon National University, Chuncheon 24341, Republic of Korea

<sup>f</sup> Department of Physics & Institute for Photonic Quantum Systems (PhoQS), Paderborn University, 33098 Paderborn, Germany

<sup>1</sup> These authors contributed equally

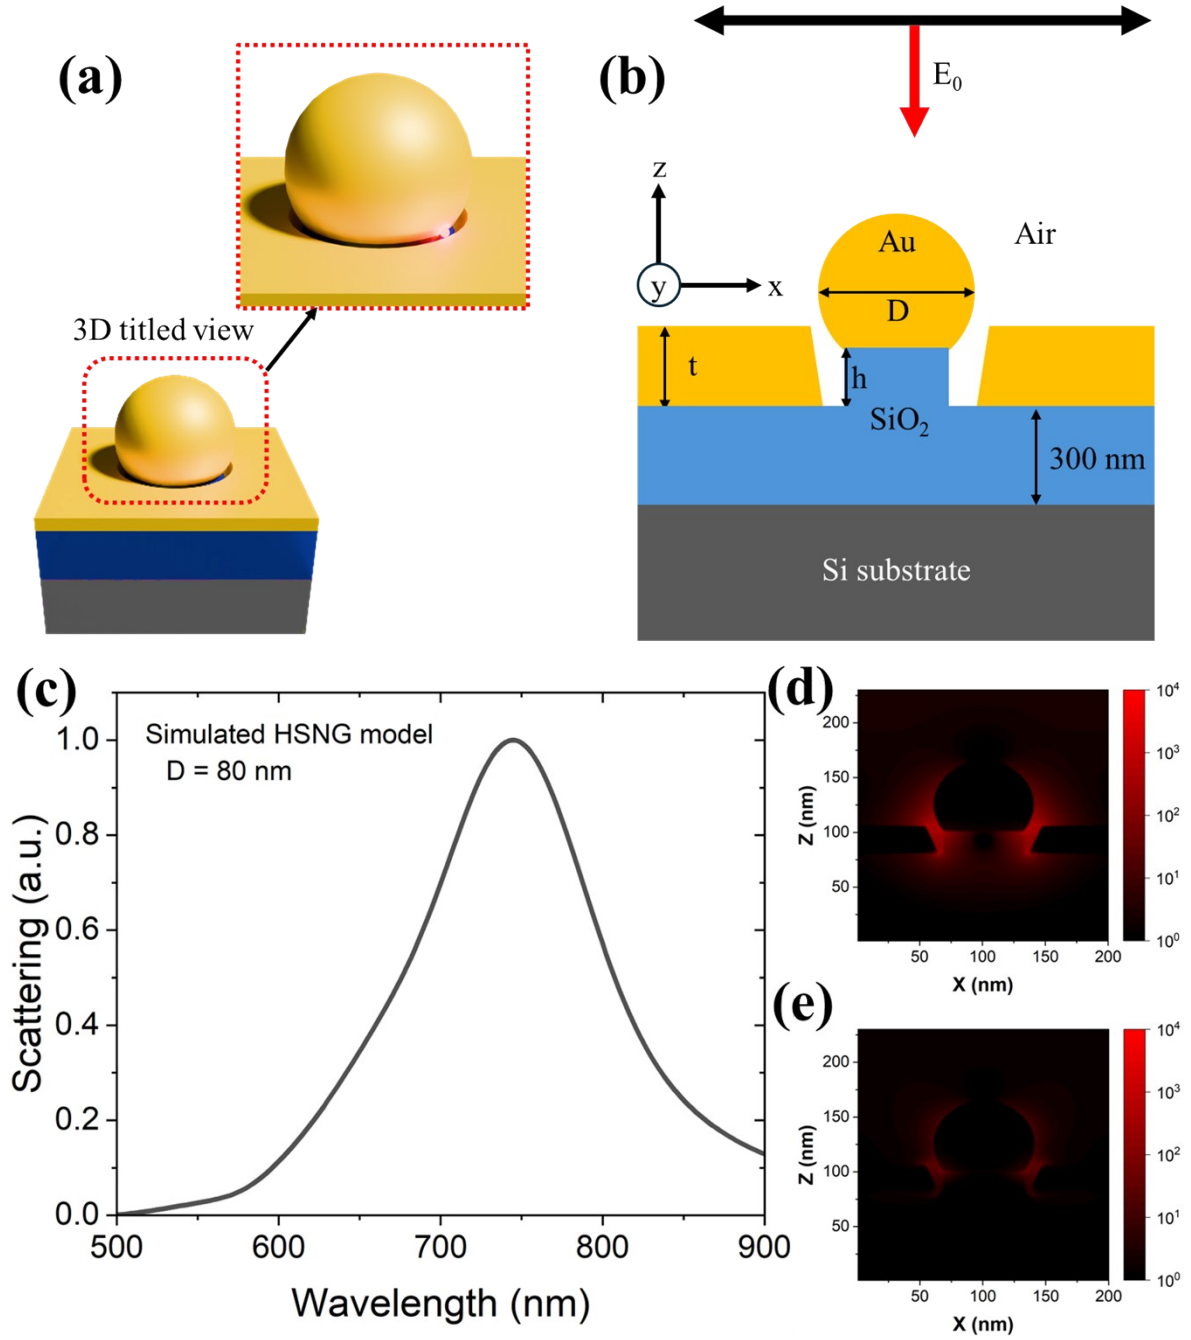

Figure S1. Plasmonic nanostructure model used in FDTD simulation in (a) three-dimensional and (b) cross-sectional schematic. A planewave light source with an incident electric field of  $E_0$  is used to excite the structure from top. Geometrical parameters employed in model: Au NP diameter is  $D = 80$  nm, SiO<sub>2</sub> pillar height is  $h = 20$  nm, Au sidewall film thickness is  $t = 30$  nm. (c) Simulated plasmonic scattering spectra obtained with 80 nm gold in a HSNG model. Cross-sectional electric field amplitude profiles  $|E/E_0|^2$  extracted at (d) 750 nm and (e) 530 nm.

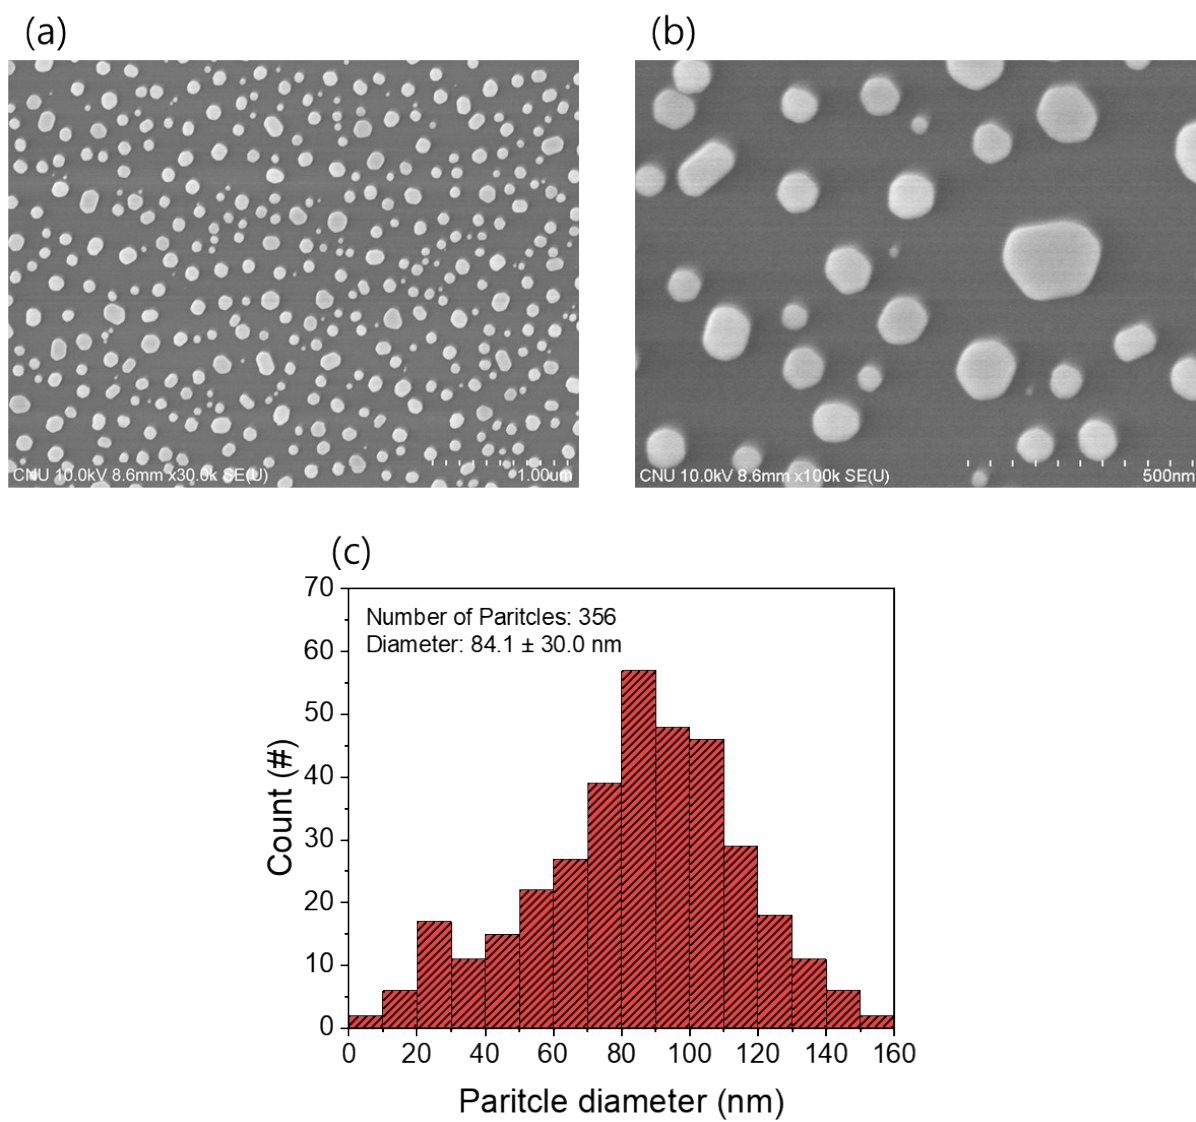

Figure S2. (a, b) SEM images (top view) of fabricated gold nanoparticles at different magnifications and (c) particle diameter distribution calculated from the (a).

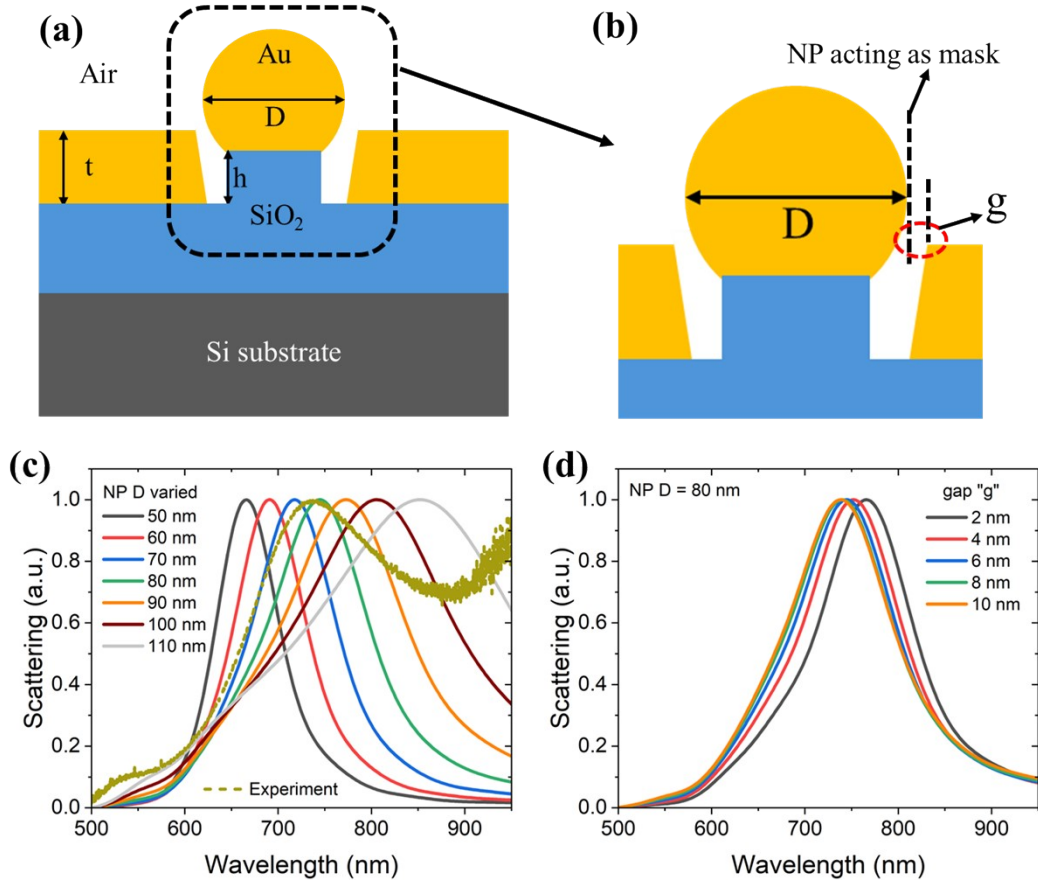

Figure S3 (a-b) HSN model with geometrical variations in NP diameter “ $D$ ” and gap size “ $g$ ”. (b) The starting position of “ $g$ ” directly depends upon “ $D$ ” as NP acts as a mask during Au film deposition. Simulated plasmonic scattering responses for (c) NP diameter variations ( $g = 6$  nm fixed) and (d) nano gap variations ( $D = 80$  nm fixed).

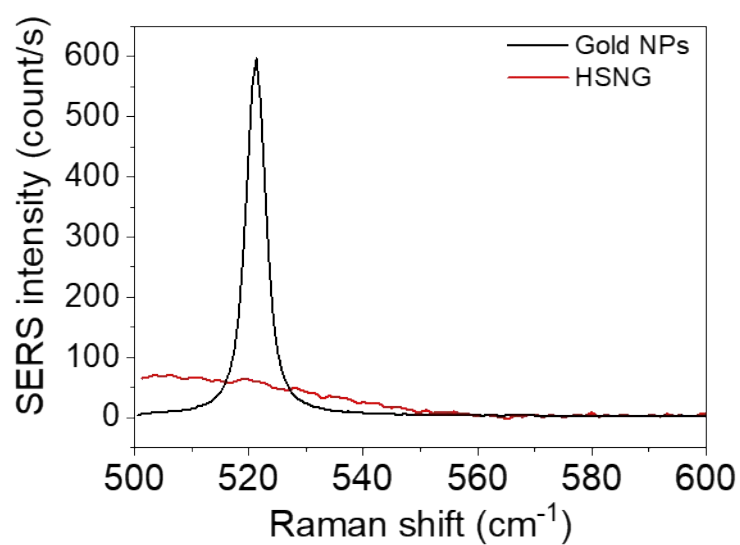

Figure S4. Surface-enhanced Raman spectroscopy (SERS) spectra for HSNG and gold nanoparticles when excited with 785 nm laser. HSNG ~ eliminates the substrate induced (Si signal) effect with the help of second Au deposition.

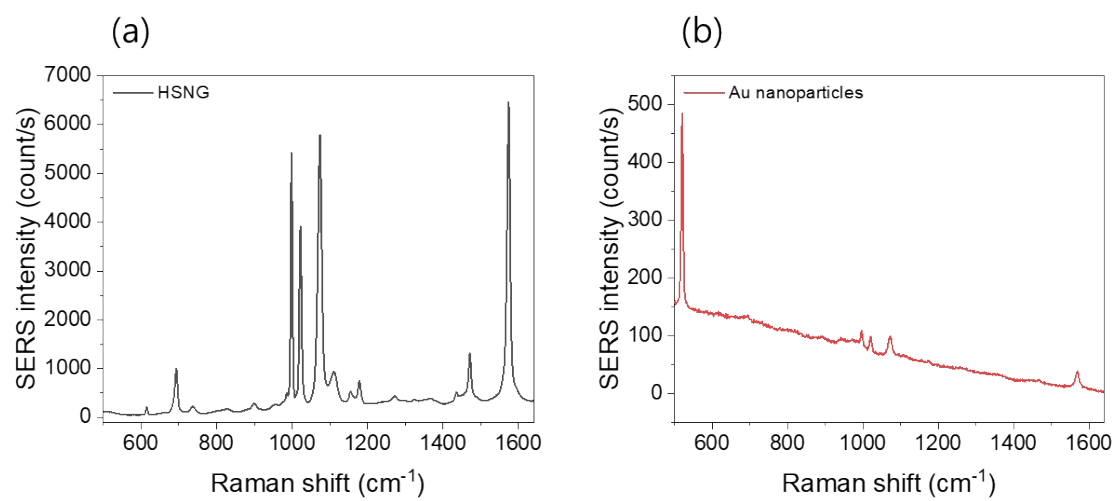

Figure S5. Surface-enhanced Raman spectroscopy (SERS) spectrum of the benzenethiol monolayer excited at 633 nm (a) on HSNG and (b) on gold nanoparticles.

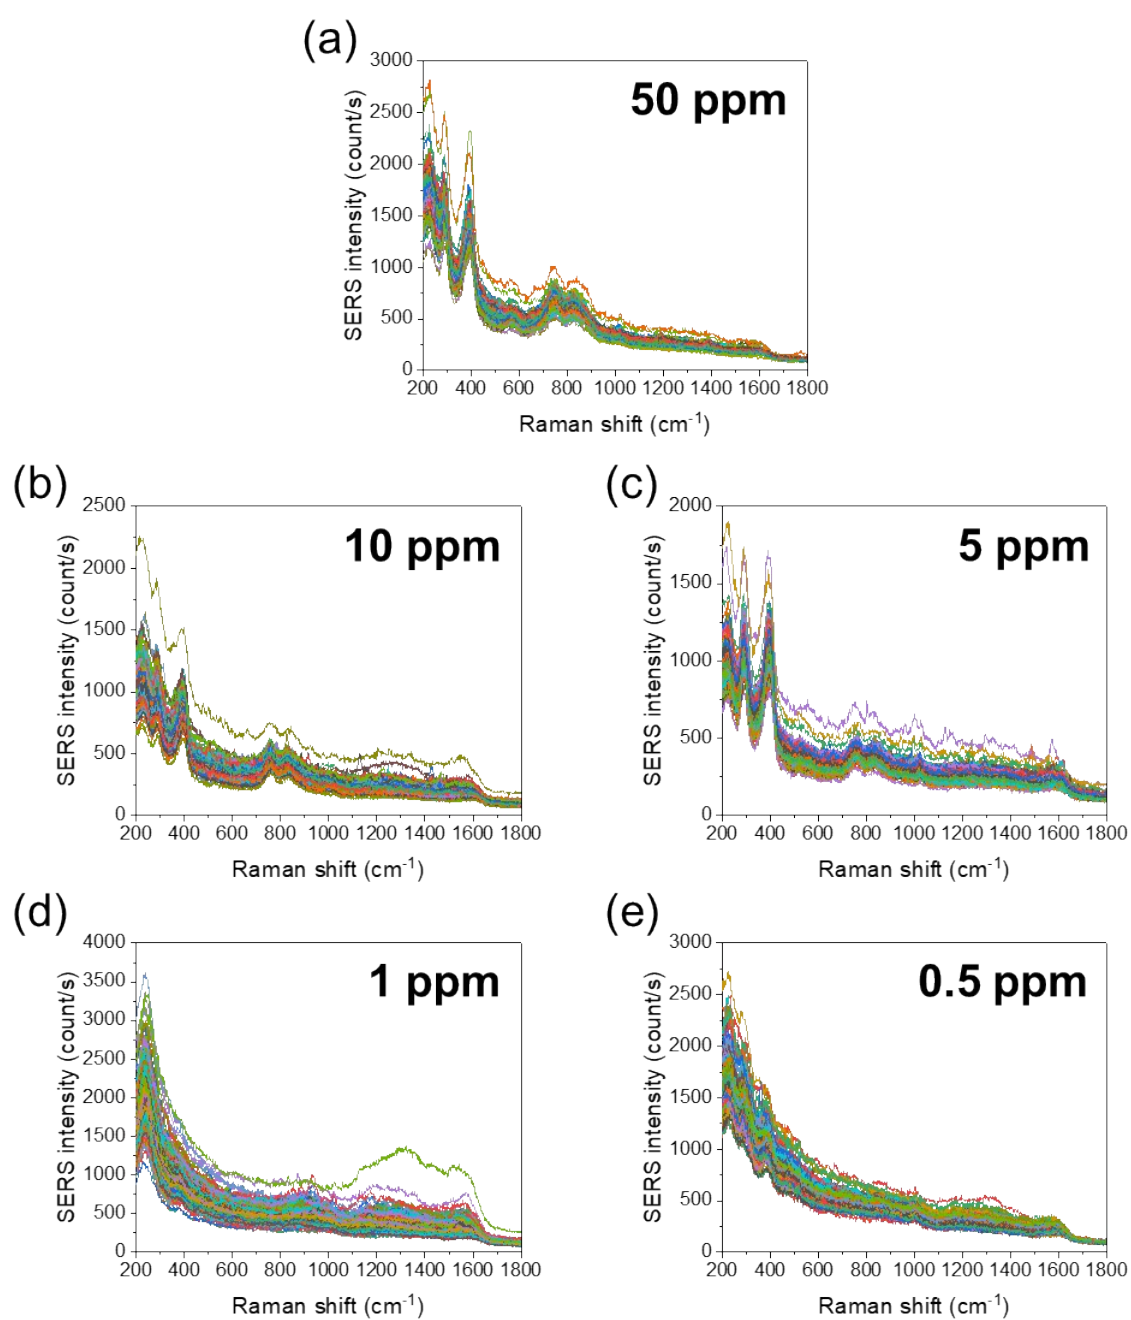

Figure S6. SERS spectra of  $\text{As}^{3+}$  (a) 50 ppm, (b) 10 ppm, (c) 5 ppm, (d) 1 ppm, (e) 0.5 ppm, solutions diluted in deionized water.

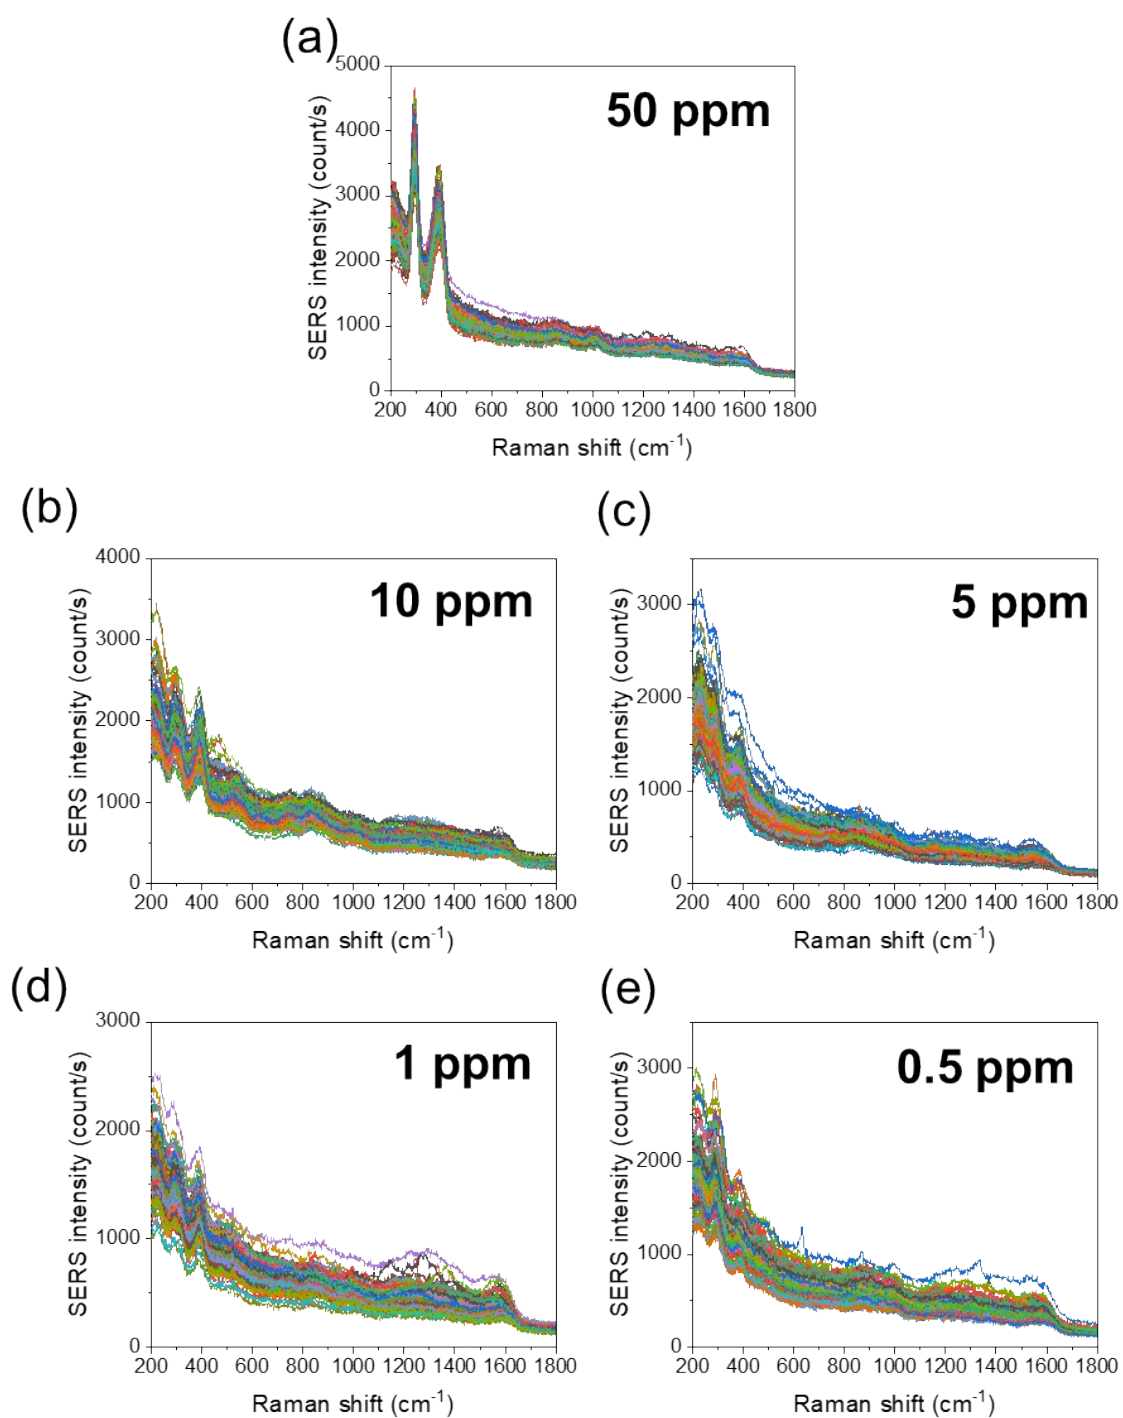

Figure S7. SERS spectra of  $\text{As}^{5+}$  (a) 50 ppm, (b) 10 ppm, (c) 5 ppm, (d) 1 ppm, (e) 0.5 ppm, solutions diluted in deionized water.



(a) **As<sup>3+</sup> 50 ppm**

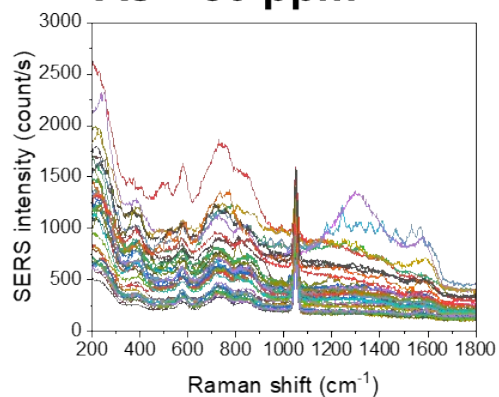

(b) **As<sup>3+</sup> 10 ppm**

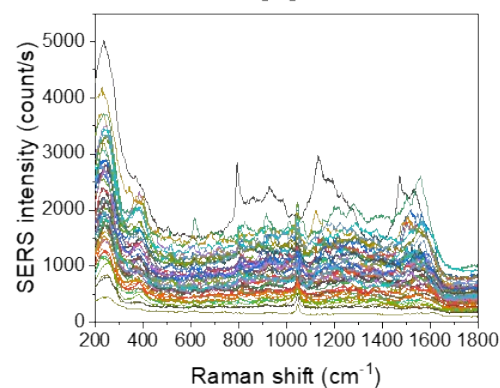

(c) **As<sup>5+</sup> 50 ppm**

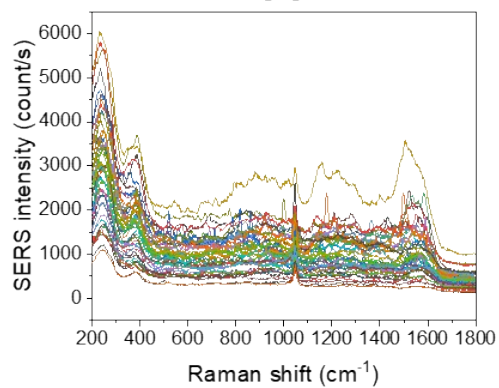

(d) **As<sup>5+</sup> 10 ppm**

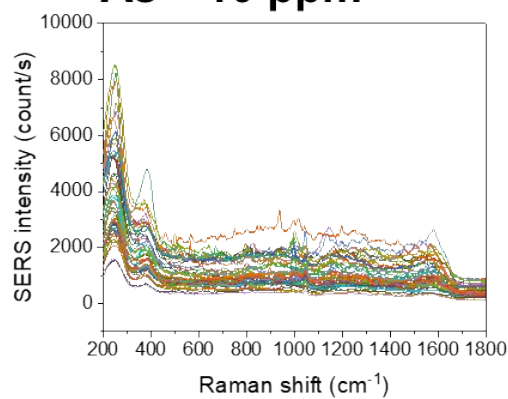

Figure S8. SERS spectra of As<sup>3+</sup> (a) 50 ppm, (b) 10 ppm, As<sup>5+</sup> (c) 50 ppm, (d) 10 ppm solutions diluted in Mehlich 3.

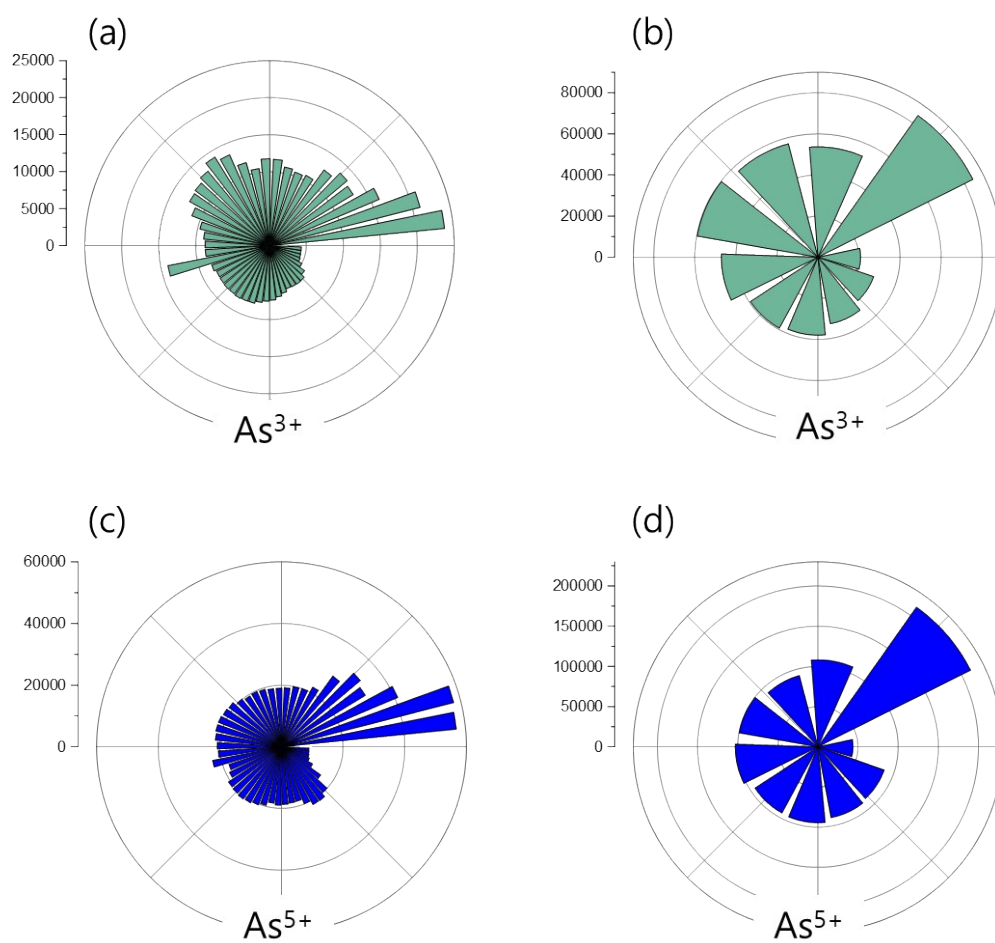

Figure S9. (a,c) Integrated spectral patterns of  $\text{As}^{3+}$  and  $\text{As}^{5+}$  over  $36.7 \text{ cm}^{-1}$ . (b,d) Integrated spectral patterns of  $\text{As}^{3+}$  and  $\text{As}^{5+}$  over  $75.2 \text{ cm}^{-1}$ .

### SERS enhancement factor calibration

To evaluate the area-averaged enhancement factor, pure benzenethiol (BT) liquid was employed as a reference standard. Specifically, 2  $\mu\text{L}$  of 9.8 M neat BT was dispensed into 2  $\mu\text{m}$ -deep wells with a 200  $\mu\text{m}$  diameter on a microscope slide. The droplet was then overlaid with a cover slip, allowing a thin layer of BT to spread slightly across the glass surface. Raman measurements were conducted using a 50X objective lens. Analysis of the 1000  $\text{cm}^{-1}$  Raman peak revealed BT layer thicknesses of approximately 6  $\mu\text{m}$  within the recessed well and 4  $\mu\text{m}$  in the region between the slide and the cover glass—values consistent with theoretical estimates based on the volume dispensed.

The total number of benzenethiol molecules present in a well volume of 200  $\mu\text{m}$  in diameter and 2  $\mu\text{m}$  in height is  $2.8 \times 10^{10}$ , considering a density of 1.08  $\text{gm/mL}$ . The molecular density of benzenethiol forming a self-assembled monolayer has been reported to be  $6.8 \times 10^{14}$  molecules per  $\text{cm}^2$  [1]. Therefore, the total number of benzenethiol molecules forming a self-assembled monolayer within the laser spot is  $5.3 \times 10^6$ . The signal of bulk benzenethiol is about 0.4 counts/s based on the 1572  $\text{cm}^{-1}$  peak when a 25% ND filter is used. On the other hand, the signal of benzenethiol 1572  $\text{cm}^{-1}$  peak when a 10% ND filter is used in the nanogap is about 6800 counts/s. Finally, the SERS EF is

$$EF = \text{molecule number ratio} * \text{SERS signal ratio}$$

$$= \frac{2.8 \times 10^{10}}{5.3 \times 10^6} * \frac{6800}{0.4} * \frac{0.25}{0.1} = 2.2 \times 10^9$$

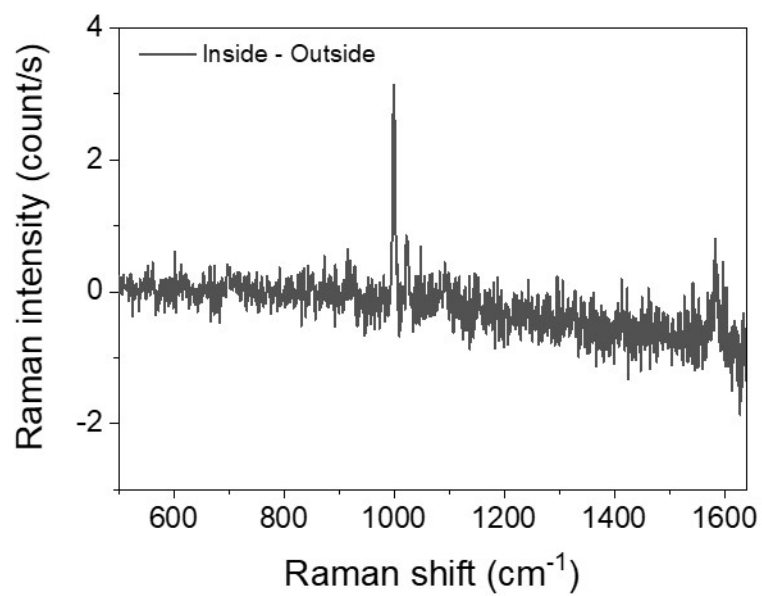

Figure S10. Raman signal of bulk benzenethiol in a 2 um deep well

## References

- 1 C. M. Whelan, M. R. Smyth, and C. J. Barnes. *Langmuir* 1999, 15, 116-126.
